# Supplementary material for: Metabolomics for early detection of stress in freshwater alga Poterioochromonas malhamensis exposed to silver nanoparticles
Source: PubMed Central journal article supplement (PMC7689461; doi:10.1038/s41598-020-77521-0), 2020-11-25
Supplement: 41598_2020_77521_MOESM1_ESM.pdf [file 41598_2020_77521_MOESM1_ESM.pdf]

# Supplementary information

## Metabolomics for early detection of stress in freshwater alga

### *Poteroochromonas malhamensis* exposed to silver nanoparticles

Wei Liu<sup>a</sup>, Sanghamitra Majumdar<sup>b</sup>, Weiwei Li<sup>b</sup>, Arturo A. Keller<sup>b</sup>, Vera I. Slaveykova<sup>a,\*</sup>

<sup>a</sup>University of Geneva, Faculty of Sciences, Earth and Environment Sciences, Department F.-A. Forel for Environmental and Aquatic Sciences, Environmental Biogeochemistry and Ecotoxicology, Uni Carl Vogt, 66 Blvd Carl-Vogt, CH 1211 Geneva, Switzerland

<sup>b</sup>Bren School of Environmental Science & Management, University of California, Santa Barbara, California 93106-5131, United States

\*corresponding author: [vera.slaveykova@unige.ch](mailto:vera.slaveykova@unige.ch)

## Content

1. Metabolic perturbations induced by AgNPs and dissolved Ag
2. Different groups of metabolites identified by cluster analysis
3. AgNPs and dissolved Ag induced changes in abundance of nucleotide/side metabolites
4. AgNPs and dissolved Ag induced changes in abundance of fatty acids metabolites
5. AgNPs and dissolved Ag induced changes in abundance of carbocyclic acids metabolites
6. Metabolic perturbations induced by 2h-exposure to AgNPs and dissolved Ag
7. Metabolic perturbations induced by 24h-exposure to AgNPs and dissolved Ag
8. Metabolites common and specific for the two exposure times
9. Characteristics of stock suspension of AgNPs
10. Composition of the Waris-H medium
11. Determination of AgNPs dissolution in the exposure medium
12. Silver cellular burden of *P. malhamensis* exposed to AgNPs for 2 and 24h
13. Effect of AgNPs and dissolved Ag on algal growth
14. Determination of the cellular ROS upon AgNPs and dissolved Ag exposure
15. Determination of the lipid peroxidation upon AgNPs and dissolved Ag exposure
16. Determination of photosynthetic activity upon AgNPs and dissolved Ag exposure
17. Metabolites and MS parameters for LC-MS targeted metabolomics

## 1. Metabolic perturbations induced by AgNPs and dissolved Ag

**Table S1.** Important features identified by One-way ANOVA and Fisher's post-hoc analysis in *P. malhamensis* exposed to 40.7  $\mu\text{gL}^{-1}$  AgNO<sub>3</sub>; and 1  $\text{mgL}^{-1}$  AgNPs and unexposed controls at 2 and 24h. Data were normalized with respect to unexposed control at time 0 (C0).

| Metabolite     | f.value | p.value    | -LOG10(p) | FDR        | Fisher's LSD                                                                                                                                                                                                                                                                                   |
|----------------|---------|------------|-----------|------------|------------------------------------------------------------------------------------------------------------------------------------------------------------------------------------------------------------------------------------------------------------------------------------------------|
| Homoserine     | 1688.3  | 3.4258e-19 | 18.465    | 1.7129e-17 | Ag 24 - Ag 2; AgNPs 24 - Ag 2; Ag 2 - C 0; Ag 2 - C 2; Ag 2 - C 24; Ag 24 - AgNP 2; Ag 24 - C 0; Ag 24 - C 2; Ag 24 - C 24; AgNPs 24 - AgNP 2; AgNP 2 - C 0; AgNP 2 - C 2; AgNP 2 - C 24; AgNPs 24 - C 0; AgNPs 24 - C 2; AgNPs 24 - C 24; C 0 - C 24; C 2 - C 24                              |
| Arginine       | 335.41  | 2.6716e-14 | 13.573    | 4.9115e-13 | Ag 24 - Ag 2; Ag 2 - AgNP 2; AgNPs 24 - Ag 2; C 0 - Ag 2; C 2 - Ag 2; C 24 - Ag 2; Ag 24 - AgNP 2; C 0 - Ag 24; C 2 - Ag 24; C 24 - Ag 24; AgNPs 24 - AgNP 2; C 0 - AgNP 2; C 2 - AgNP 2; C 24 - AgNP 2; C 0 - AgNPs 24; C 2 - AgNPs 24; C 24 - AgNPs 24                                       |
| Citric acid    | 330.7   | 2.9469e-14 | 13.531    | 4.9115e-13 | Ag 2 - Ag 24; Ag 2 - C 0; Ag 2 - C 2; Ag 2 - C 24; Ag 24 - C 0; Ag 24 - C 2; Ag 24 - C 24; AgNP 2 - C 0; AgNP 2 - C 2; AgNP 2 - C 24; AgNPs 24 - C 0; AgNPs 24 - C 2; AgNPs 24 - C 24; C 2 - C 0                                                                                               |
| Threonine      | 303.63  | 5.3286e-14 | 13.273    | 6.6608e-13 | Ag 2 - Ag 24; Ag 2 - AgNP 2; Ag 2 - AgNPs 24; C 0 - Ag 2; C 2 - Ag 2; C 24 - Ag 2; AgNP 2 - Ag 24; C 0 - Ag 24; C 2 - Ag 24; C 24 - Ag 24; AgNP 2 - AgNPs 24; C 0 - AgNP 2; C 2 - AgNP 2; C 24 - AgNP 2; C 0 - AgNPs 24; C 2 - AgNPs 24; C 24 - AgNPs 24; C 0 - C 2; C 0 - C 24                |
| Ornithine      | 236.86  | 2.9751e-13 | 12.526    | 2.9751e-12 | Ag 24 - Ag 2; AgNPs 24 - Ag 2; Ag 2 - C 0; Ag 2 - C 2; Ag 2 - C 24; Ag 24 - AgNP 2; Ag 24 - C 0; Ag 24 - C 2; Ag 24 - C 24; AgNPs 24 - AgNP 2; AgNP 2 - C 0; AgNP 2 - C 2; AgNP 2 - C 24; AgNPs 24 - C 0; AgNPs 24 - C 2; AgNPs 24 - C 24; C 2 - C 0; C 24 - C 0; C 24 - C 2                   |
| Glutaric acid  | 222.3   | 4.6117e-13 | 12.336    | 3.843e-12  | Ag 2 - C 0; Ag 2 - C 2; Ag 2 - C 24; AgNPs 24 - Ag 24; Ag 24 - C 0; Ag 24 - C 2; Ag 24 - C 24; AgNP 2 - C 0; AgNP 2 - C 2; AgNP 2 - C 24; AgNPs 24 - C 0; AgNPs 24 - C 2; AgNPs 24 - C 24                                                                                                      |
| Asparagine     | 209.17  | 7.0235e-13 | 12.153    | 5.0168e-12 | Ag 2 - Ag 24; Ag 2 - AgNPs 24; C 0 - Ag 2; C 2 - Ag 2; C 24 - Ag 2; AgNP 2 - Ag 24; C 0 - Ag 24; C 2 - Ag 24; C 24 - Ag 24; AgNP 2 - AgNPs 24; C 0 - AgNP 2; C 2 - AgNP 2; C 24 - AgNP 2; C 0 - AgNPs 24; C 2 - AgNPs 24; C 24 - AgNPs 24; C 0 - C 2; C 0 - C 24                               |
| AMP            | 140.9   | 1.0651e-11 | 10.973    | 6.657e-11  | Ag 2 - Ag 24; Ag 2 - AgNPs 24; Ag 2 - C 0; Ag 2 - C 2; Ag 2 - C 24; AgNP 2 - Ag 24; Ag 24 - C 0; Ag 24 - C 2; Ag 24 - C 24; AgNP 2 - AgNPs 24; AgNP 2 - C 0; AgNP 2 - C 2; AgNP 2 - C 24; AgNPs 24 - C 0; AgNPs 24 - C 2; AgNPs 24 - C 24; C 2 - C 0; C 24 - C 0                               |
| Phenylalanine  | 128.58  | 1.993e-11  | 10.7      | 1.0834e-10 | C 0 - Ag 2; C 2 - Ag 2; C 24 - Ag 2; C 0 - Ag 24; C 2 - Ag 24; C 24 - Ag 24; C 0 - AgNP 2; C 2 - AgNP 2; C 24 - AgNP 2; C 0 - AgNPs 24; C 2 - AgNPs 24; C 24 - AgNPs 24                                                                                                                        |
| Citrulline     | 127.02  | 2.1667e-11 | 10.664    | 1.0834e-10 | Ag 24 - Ag 2; AgNPs 24 - Ag 2; Ag 2 - C 0; Ag 2 - C 2; Ag 2 - C 24; Ag 24 - AgNP 2; Ag 24 - C 0; Ag 24 - C 2; Ag 24 - C 24; AgNPs 24 - AgNP 2; AgNP 2 - C 0; AgNP 2 - C 2; AgNP 2 - C 24; AgNPs 24 - C 0; AgNPs 24 - C 2; AgNPs 24 - C 24; C 2 - C 0; C 24 - C 0                               |
| Adenine        | 113.51  | 4.6724e-11 | 10.33     | 2.1238e-10 | Ag 24 - Ag 2; AgNPs 24 - Ag 2; Ag 2 - C 0; Ag 2 - C 2; Ag 2 - C 24; Ag 24 - AgNP 2; AgNPs 24 - Ag 24; Ag 24 - C 0; Ag 24 - C 2; Ag 24 - C 24; AgNPs 24 - AgNP 2; AgNP 2 - C 0; AgNP 2 - C 2; AgNP 2 - C 24; AgNPs 24 - C 0; AgNPs 24 - C 2; AgNPs 24 - C 24; C 0 - C 2; C 0 - C 24; C 24 - C 2 |
| Arachidic acid | 102.66  | 9.2656e-11 | 10.033    | 3.8607e-10 | C 0 - Ag 2; C 2 - Ag 2; C 24 - Ag 2; C 0 - Ag 24; C 2 - Ag 24; C 24 - Ag 24; C 0 - AgNP 2; C 2 - AgNP 2; C 24 - AgNP 2; C 0 - AgNPs 24; C 2 - AgNPs 24; C 24 - AgNPs 24; C 24 - AgNPs 24; C 24 - C 0                                                                                           |

|                     |        |            |        |            |                                                                                                                                                                                                                                                                                    |
|---------------------|--------|------------|--------|------------|------------------------------------------------------------------------------------------------------------------------------------------------------------------------------------------------------------------------------------------------------------------------------------|
| Lysine              | 99.698 | 1.1309e-10 | 9.9466 | 4.3498e-10 | Ag 24 - Ag 2; AgNPs 24 - Ag 2; Ag 24 - AgNP 2; Ag 24 - C 0; Ag 24 - C 2; Ag 24 - C 24; AgNPs 24 - AgNP 2; AgNPs 24 - C 0; AgNPs 24 - C 2; AgNPs 24 - C 24                                                                                                                          |
| Xanthine            | 92.533 | 1.877e-10  | 9.7265 | 6.7036e-10 | Ag 2 - Ag 24; Ag 2 - AgNPs 24; C 0 - Ag 2; C 2 - Ag 2; C 24 - Ag 2; AgNP 2 - Ag 24; AgNPs 24 - Ag 24; C 0 - Ag 24; C 2 - Ag 24; C 24 - Ag 24; AgNP 2 - AgNPs 24; C 0 - AgNP 2; C 2 - AgNP 2; C 24 - AgNP 2; C 0 - AgNPs 24; C 2 - AgNPs 24; C 24 - AgNPs 24; C 2 - C 0; C 2 - C 24 |
| Glutamine           | 87.246 | 2.7967e-10 | 9.5534 | 9.3224e-10 | Ag 2 - Ag 24; Ag 2 - AgNP 2; Ag 2 - AgNPs 24; C 0 - Ag 2; C 2 - Ag 2; C 24 - Ag 2; AgNP 2 - Ag 24; AgNPs 24 - Ag 24; C 0 - Ag 24; C 2 - Ag 24; C 24 - Ag 24; AgNP 2 - AgNPs 24; C 0 - AgNP 2; C 2 - AgNP 2; C 24 - AgNP 2; C 0 - AgNPs 24; C 2 - AgNPs 24; C 24 - AgNPs 24         |
| Cytidine            | 82.499 | 4.0838e-10 | 9.3889 | 1.2762e-09 | Ag 2 - Ag 24; Ag 2 - AgNPs 24; Ag 2 - C 0; Ag 2 - C 2; Ag 2 - C 24; AgNP 2 - Ag 24; Ag 24 - C 2; Ag 24 - C 24; AgNP 2 - AgNPs 24; AgNP 2 - C 0; AgNP 2 - C 2; AgNP 2 - C 24; AgNPs 24 - C 2; AgNPs 24 - C 24; C 0 - C 2; C 0 - C 24                                                |
| Tyrosine            | 74.57  | 8.0754e-10 | 9.0928 | 2.3751e-09 | Ag 2 - Ag 24; C 0 - Ag 2; C 2 - Ag 2; C 24 - Ag 2; C 0 - Ag 24; C 2 - Ag 24; C 24 - Ag 24; C 0 - AgNP 2; C 2 - AgNP 2; C 24 - AgNP 2; C 0 - AgNPs 24; C 2 - AgNPs 24; C 24 - AgNPs 24                                                                                              |
| Stearic acid        | 68.881 | 1.3769e-09 | 8.8611 | 3.8247e-09 | C 0 - Ag 2; C 2 - Ag 2; C 24 - Ag 2; C 0 - Ag 24; C 2 - Ag 24; C 24 - Ag 24; C 0 - AgNP 2; C 2 - AgNP 2; C 24 - AgNP 2; C 0 - AgNPs 24; C 2 - AgNPs 24; C 24 - AgNPs 24; C 24 - C 0; C 24 - C 2                                                                                    |
| Succinic acid       | 61.495 | 2.9433e-09 | 8.5312 | 7.6683e-09 | Ag 2 - C 0; Ag 2 - C 2; Ag 2 - C 24; Ag 24 - C 0; Ag 24 - C 2; Ag 24 - C 24; AgNP 2 - C 0; AgNP 2 - C 2; AgNP 2 - C 24; AgNPs 24 - C 0; AgNPs 24 - C 2; AgNPs 24 - C 24; C 24 - C 0                                                                                                |
| Histidine           | 61.116 | 3.0673e-09 | 8.5132 | 7.6683e-09 | Ag 2 - AgNP 2; C 0 - Ag 2; C 2 - Ag 2; C 24 - Ag 2; Ag 24 - AgNP 2; C 0 - Ag 24; C 2 - Ag 24; C 24 - Ag 24; AgNPs 24 - AgNP 2; C 0 - AgNP 2; C 2 - AgNP 2; C 24 - AgNP 2; C 0 - AgNPs 24; C 2 - AgNPs 24; C 24 - AgNPs 24                                                          |
| Ethanolamine        | 56.573 | 5.1332e-09 | 8.2896 | 1.2222e-08 | Ag 24 - Ag 2; AgNPs 24 - Ag 2; Ag 2 - C 0; Ag 2 - C 2; Ag 2 - C 24; Ag 24 - AgNP 2; AgNPs 24 - Ag 24; Ag 24 - C 0; Ag 24 - C 2; Ag 24 - C 24; AgNPs 24 - AgNP 2; AgNP 2 - C 0; AgNP 2 - C 2; AgNP 2 - C 24; AgNPs 24 - C 0; AgNPs 24 - C 2; AgNPs 24 - C 24; C 0 - C 2             |
| Glutathione reduced | 55.418 | 5.8879e-09 | 8.23   | 1.3382e-08 | Ag 24 - Ag 2; Ag 2 - C 0; Ag 2 - C 2; Ag 2 - C 24; Ag 24 - AgNP 2; Ag 24 - C 0; Ag 24 - C 2; Ag 24 - C 24; AgNP 2 - C 0; AgNP 2 - C 2; AgNP 2 - C 24; AgNPs 24 - C 0; AgNPs 24 - C 2; AgNPs 24 - C 24; C 2 - C 0; C 24 - C 0                                                       |
| tryptophan          | 49.076 | 1.3173e-08 | 7.8803 | 2.8637e-08 | Ag 24 - Ag 2; AgNPs 24 - Ag 2; C 0 - Ag 2; C 2 - Ag 2; C 24 - Ag 2; Ag 24 - AgNP 2; C 0 - Ag 24; C 2 - Ag 24; C 24 - Ag 24; AgNPs 24 - AgNP 2; C 0 - AgNP 2; C 2 - AgNP 2; C 24 - AgNP 2; C 0 - AgNPs 24; C 2 - AgNPs 24; C 24 - AgNPs 24; C 24 - C 0                              |
| Methionine          | 45.901 | 2.0468e-08 | 7.6889 | 4.2642e-08 | Ag 24 - Ag 2; AgNPs 24 - Ag 2; C 0 - Ag 2; C 2 - Ag 2; C 24 - Ag 2; Ag 24 - AgNP 2; C 0 - Ag 24; C 2 - Ag 24; C 24 - Ag 24; C 0 - AgNP 2; C 2 - AgNP 2; C 24 - AgNP 2; C 0 - AgNPs 24; C 2 - AgNPs 24; C 24 - AgNPs 24                                                             |
| Leucine             | 43.846 | 2.7654e-08 | 7.5582 | 5.5308e-08 | Ag 24 - Ag 2; AgNPs 24 - Ag 2; C 0 - Ag 2; C 2 - Ag 2; C 24 - Ag 2; Ag 24 - AgNP 2; C 0 - Ag 24; C 2 - Ag 24; C 24 - Ag 24; AgNPs 24 - AgNP 2; C 0 - AgNP 2; C 2 - AgNP 2; C 24 - AgNP 2; C 0 - AgNPs 24; C 2 - AgNPs 24; C 24 - AgNPs 24; C 0 - C 2; C 0 - C 24                   |
| Glycine             | 42.299 | 3.4989e-08 | 7.4561 | 6.5325e-08 | Ag 2 - Ag 24; Ag 2 - AgNPs 24; Ag 2 - C 0; Ag 2 - C 2; Ag 2 - C 24; AgNP 2 - Ag 24; Ag 24 - C 0; Ag 24 - C 2; Ag 24 - C 24; AgNP 2 - AgNPs 24; AgNP 2 - C 0; AgNP 2 - C 2; AgNP 2 - C 24; AgNPs 24 - C 0; AgNPs 24 - C 2; AgNPs 24 - C 24                                          |

|                       |        |            |        |            |                                                                                                                                                                                                                                                             |
|-----------------------|--------|------------|--------|------------|-------------------------------------------------------------------------------------------------------------------------------------------------------------------------------------------------------------------------------------------------------------|
| CMP                   | 42.246 | 3.5276e-08 | 7.4525 | 6.5325e-08 | Ag 2 - Ag 24; Ag 2 - AgNPs 24; C 0 - Ag 2; C 2 - Ag 2; C 24 - Ag 2; AgNP 2 - Ag 24; AgNPs 24 - Ag 24; C 0 - Ag 24; C 2 - Ag 24; C 24 - Ag 24; AgNP 2 - AgNPs 24; C 0 - AgNP 2; C 2 - AgNP 2; C 24 - AgNP 2; C 0 - AgNPs 24; C 2 - AgNPs 24; C 24 - AgNPs 24 |
| Serine                | 38.797 | 6.1489e-08 | 7.2112 | 1.098e-07  | Ag 2 - Ag 24; Ag 2 - AgNPs 24; C 0 - Ag 2; C 2 - Ag 2; C 24 - Ag 2; AgNP 2 - Ag 24; C 0 - Ag 24; C 2 - Ag 24; C 24 - Ag 24; AgNP 2 - AgNPs 24; C 0 - AgNP 2; C 2 - AgNP 2; C 24 - AgNP 2; C 0 - AgNPs 24; C 2 - AgNPs 24; C 24 - AgNPs 24; C 0 - C 2        |
| Guanine               | 32.899 | 1.7853e-07 | 6.7483 | 3.0782e-07 | Ag 2 - Ag 24; Ag 2 - AgNPs 24; Ag 2 - C 0; Ag 2 - C 2; Ag 2 - C 24; AgNP 2 - Ag 24; Ag 24 - C 0; AgNP 2 - AgNPs 24; AgNP 2 - C 0; AgNP 2 - C 2; AgNP 2 - C 24; AgNPs 24 - C 0; C 2 - C 0; C 24 - C 0                                                        |
| Glutamic acid         | 31.64  | 2.2928e-07 | 6.6396 | 3.8213e-07 | Ag 2 - Ag 24; Ag 2 - AgNP 2; Ag 2 - C 0; Ag 2 - C 2; Ag 2 - C 24; AgNPs 24 - Ag 24; Ag 24 - C 0; Ag 24 - C 2; Ag 24 - C 24; AgNPs 24 - AgNP 2; AgNP 2 - C 0; AgNP 2 - C 2; AgNP 2 - C 24; AgNPs 24 - C 0; AgNPs 24 - C 2; AgNPs 24 - C 24                   |
| Glucose/<br>Galactose | 25.861 | 8.236e-07  | 6.0843 | 1.3284e-06 | C 0 - Ag 2; C 2 - Ag 2; C 24 - Ag 2; C 0 - Ag 24; C 2 - Ag 24; C 24 - Ag 24; C 0 - AgNP 2; C 2 - AgNP 2; C 24 - AgNP 2; C 0 - AgNPs 24; C 2 - AgNPs 24; C 24 - AgNPs 24                                                                                     |
| Proline               | 22.515 | 1.9529e-06 | 5.7093 | 3.0515e-06 | Ag 2 - Ag 24; Ag 2 - AgNP 2; C 0 - Ag 2; Ag 2 - C 2; Ag 2 - C 24; C 0 - Ag 24; Ag 24 - C 24; C 0 - AgNP 2; AgNP 2 - C 24; C 0 - AgNPs 24; AgNPs 24 - C 24; C 0 - C 2; C 0 - C 24; C 2 - C 24                                                                |
| Alanine               | 22.303 | 2.07e-06   | 5.684  | 3.1364e-06 | Ag 2 - Ag 24; Ag 2 - AgNP 2; Ag 2 - AgNPs 24; C 0 - Ag 2; Ag 2 - C 24; AgNP 2 - Ag 24; C 0 - Ag 24; C 2 - Ag 24; C 24 - Ag 24; AgNP 2 - AgNPs 24; C 0 - AgNP 2; C 0 - AgNPs 24; C 2 - AgNPs 24; C 24 - AgNPs 24; C 0 - C 2; C 0 - C 24                      |
| Hypoxanthine          | 21.647 | 2.4885e-06 | 5.6041 | 3.6596e-06 | Ag 2 - Ag 24; Ag 2 - AgNPs 24; Ag 2 - C 0; Ag 2 - C 2; Ag 2 - C 24; AgNP 2 - Ag 24; Ag 24 - AgNPs 24; Ag 24 - C 0; Ag 24 - C 24; AgNP 2 - AgNPs 24; AgNP 2 - C 0; AgNP 2 - C 2; AgNP 2 - C 24; AgNPs 24 - C 24; C 2 - C 0; C 2 - C 24                       |
| Ascorbic acid         | 19.7   | 4.428e-06  | 5.3538 | 6.3258e-06 | Ag 2 - Ag 24; Ag 2 - AgNPs 24; Ag 2 - C 0; Ag 2 - C 2; Ag 2 - C 24; AgNP 2 - Ag 24; Ag 24 - C 2; AgNP 2 - AgNPs 24; AgNP 2 - C 0; AgNP 2 - C 2; AgNP 2 - C 24; C 0 - AgNPs 24; C 0 - C 2; C 0 - C 24                                                        |
| Malic acid            | 18.605 | 6.2583e-06 | 5.2035 | 8.6921e-06 | Ag 2 - Ag 24; Ag 2 - AgNP 2; Ag 2 - AgNPs 24; Ag 2 - C 0; Ag 2 - C 2; Ag 2 - C 24; AgNP 2 - Ag 24; AgNPs 24 - Ag 24; Ag 24; C 0 - Ag 24; C 2 - Ag 24; C 24 - Ag 24; AgNP 2 - AgNPs 24; AgNP 2 - C 0; AgNP 2 - C 2; C 24 - AgNPs 24; C 24 - C 0; C 24 - C 2  |
| Aspartic acid         | 12.973 | 5.1744e-05 | 4.2861 | 6.9924e-05 | Ag 24 - Ag 2; Ag 2 - AgNP 2; AgNPs 24 - Ag 2; C 0 - Ag 2; Ag 24 - AgNP 2; Ag 24 - C 2; Ag 24 - C 24; AgNPs 24 - AgNP 2; C 0 - AgNP 2; C 2 - AgNP 2; C 24 - AgNP 2; AgNPs 24 - C 2; AgNPs 24 - C 24; C 0 - C 2; C 0 - C 24                                   |
| Heptadecanoic acid    | 10.702 | 0.00015087 | 3.8214 | 0.00019851 | Ag 24 - Ag 2; AgNPs 24 - Ag 2; Ag 24 - AgNP 2; Ag 24 - C 0; Ag 24 - C 2; Ag 24 - C 24; AgNPs 24 - AgNP 2; AgNPs 24 - C 0; AgNPs 24 - C 2; C 24 - C 0                                                                                                        |
| Linolenic acid        | 9.7206 | 0.00025312 | 3.5967 | 0.00032452 | Ag 24 - Ag 2; AgNPs 24 - Ag 2; Ag 24 - AgNP 2; Ag 24 - C 0; Ag 24 - C 2; Ag 24 - C 24; AgNPs 24 - AgNP 2; AgNP 2 - C 2; AgNPs 24 - C 0; AgNPs 24 - C 2; AgNPs 24 - C 24                                                                                     |
| Adenosine             | 9.0574 | 0.00036732 | 3.435  | 0.00045916 | Ag 2 - Ag 24; C 0 - Ag 2; C 24 - Ag 2; AgNP 2 - Ag 24; C 0 - Ag 24; C 2 - Ag 24; C 24 - Ag 24; C 0 - AgNP 2; C 24 - AgNP 2; C 0 - AgNPs 24; C 24 - AgNPs 24; C 0 - C 2; C 24 - C 2                                                                          |
| Thymine               | 8.4444 | 0.00052771 | 3.2776 | 0.00064355 | Ag 2 - C 0; C 24 - Ag 2; C 24 - Ag 24; AgNP 2 - C 0; C 24 - AgNP 2; C 24 - AgNPs 24; C 2 - C 0; C 24 - C 0; C 24 - C 2                                                                                                                                      |

|               |        |            |        |            |                                                                                                                                               |
|---------------|--------|------------|--------|------------|-----------------------------------------------------------------------------------------------------------------------------------------------|
| Uracil        | 8.0413 | 0.00067669 | 3.1696 | 0.00080559 | Ag 2 - Ag 24; Ag 2 - AgNPs 24; Ag 2 - C 0; C 24 - Ag 24; AgNP 2 - C 0; C 24 - AgNP 2; C 24 - AgNPs 24; C 2 - C 0; C 24 - C 0; C 24 - C 2      |
| Myristic acid | 6.1261 | 0.0025207  | 2.5985 | 0.0029311  | Ag 2 - AgNP 2; Ag 2 - C 0; Ag 24 - AgNP 2; Ag 24 - C 0; Ag 24 - C 2; AgNPs 24 - AgNP 2; C 24 - AgNP 2; AgNPs 24 - C 0; C 24 - C 0; C 24 - C 2 |
| Linoleic acid | 5.0221 | 0.0060882  | 2.2155 | 0.0069184  | Ag 24 - Ag 2; AgNPs 24 - Ag 2; C 24 - Ag 2; Ag 24 - C 0; C 24 - AgNP 2; AgNPs 24 - C 0; C 24 - C 0; C 24 - C 2                                |
| Palmitic acid | 4.7251 | 0.0078663  | 2.1042 | 0.0087403  | C 24 - Ag 2; Ag 24 - C 0; C 24 - AgNP 2; AgNPs 24 - C 0; C 24 - C 0; C 24 - C 2                                                               |

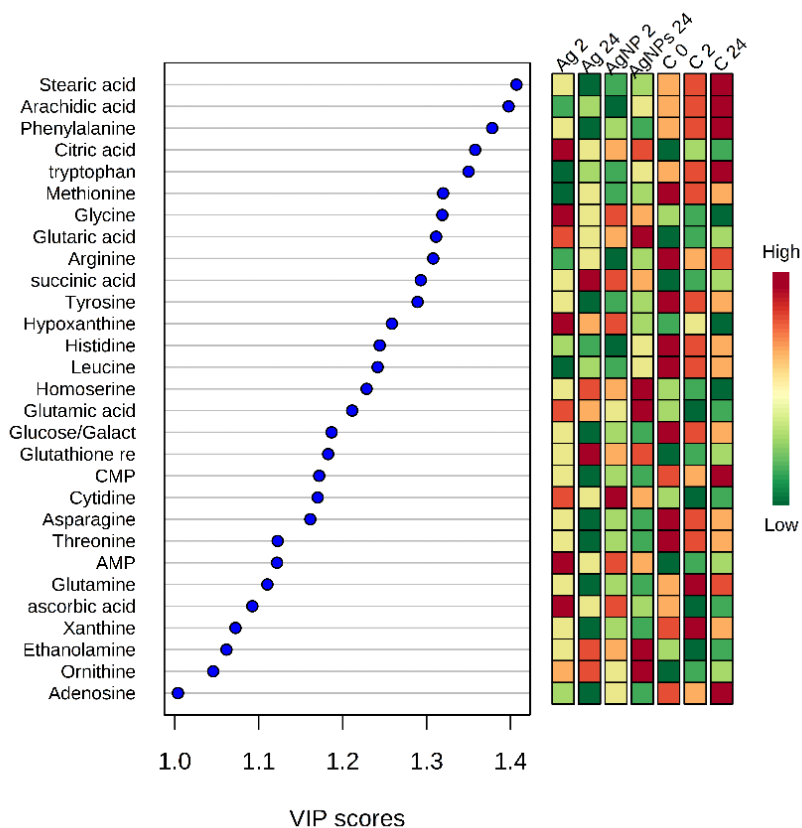

**Figure S1.** Important features identified by PLS-DA. The coloured boxes on the right indicate the relative concentrations of the corresponding metabolite in each group under study. VIP scores from PLS-DA analysis of discriminating metabolites between unexposed controls,  $40.7 \mu\text{gL}^{-1}$   $\text{AgNO}_3$  and  $1 \text{mgL}^{-1}$  AgNPs groups for 2h and 24h. Treatments: Ag2: 2h exposure to  $40.7 \mu\text{gL}^{-1}$   $\text{AgNO}_3$ ; Ag24: 24h-exposure to  $40.7 \mu\text{gL}^{-1}$   $\text{AgNO}_3$ ; AgNPs2: 2h exposure to  $1 \text{mgL}^{-1}$  AgNPs; AgNPs24: 24h exposure to  $1 \text{mgL}^{-1}$  AgNPs; C0: unexposed controls at time 0 (beginning of the experiment); C2: unexposed controls at time 2h; C24: unexposed controls at time 24h. Data were normalized with respect to unexposed control at time 0 (C0). The plot was generated by MetaboAnalyst 4.0 (<https://www.metaboanalyst.ca/>)<sup>1</sup>

## **2. Different groups of metabolites identified by cluster analysis**

Different groups of metabolites were identified by cluster analysis (Fig. 4C). The first one represents the metabolites that were depleted under the Ag-treatments at 2 and 24h in comparison with unexposed controls and included 17 metabolites: adenosine, arachidic acid, arginine, asparagine, CMP, glucose/galactose, glutamine, histidine, leucine, methionine, phenylalanine, serine, stearic acid, threonine, tryptophan, tyrosine and xanthine. The second cluster corresponded to metabolites which accumulated during the Ag-treatments, which was more pronounced at 24h than at 2h exposure and included 10 metabolites: adenine, citric acid, citrulline, ethanolamine, glutamic acid, glutaric acid, glutathione reduced, homoserine, ornithine and succinic acid. The third cluster included, aspartic acid, heptadecanoic acid, linolenic acid and lysine, which significantly accumulated only during 24h exposure to AgNPs and dissolved Ag. The fourth cluster included AMP, ascorbic acid, cytidine, glycine, guanine, hypoxanthine and malic acid which accumulated only during 2h exposure to AgNPs and dissolved Ag. More complex pattern was observed in the fifth cluster including thymine, uracil, myristic, linoleic and palmitic acids.

### 3. AgNPs and dissolved Ag induced changes in abundance of nucleotide/side metabolites

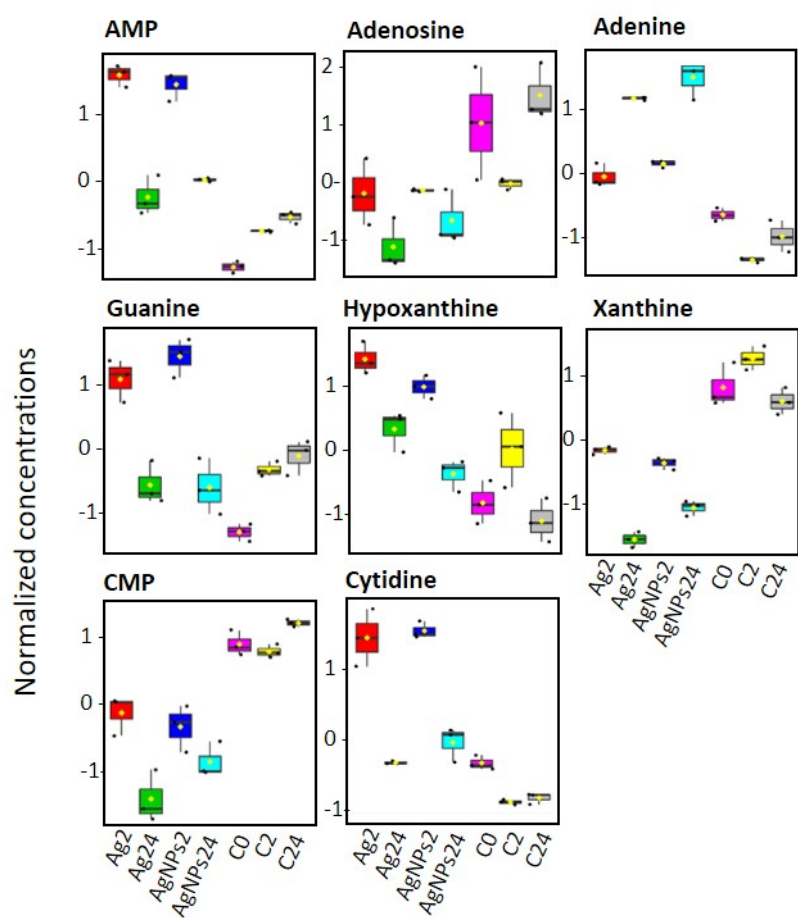

**Figure S2.** Box plots of relative abundance of nucleotide/side metabolites in *P. malhamensis* treated with  $1\text{mgL}^{-1}$  AgNPs and  $40.7\ \mu\text{gL}^{-1}$  AgNO<sub>3</sub> for 2 and 24h and untreated controls. Treatments: Ag2: 2h exposure to  $40.7\ \mu\text{gL}^{-1}$  AgNO<sub>3</sub>; Ag24: 24h-exposure to  $40.7\ \mu\text{gL}^{-1}$  AgNO<sub>3</sub>; AgNPs2, 2h exposure to  $1\ \text{mgL}^{-1}$  AgNPs; AgNPs24; 24h exposure to  $1\ \text{mgL}^{-1}$  AgNPs; C0: unexposed controls at time 0 (beginning of the experiment); C2: unexposed controls at time 2h; C24: unexposed controls at time 24h. Data were normalized with respect to unexposed control at time 0 (C0).



#### 4. AgNPs and dissolved Ag induced changes in abundance of fatty acids metabolites

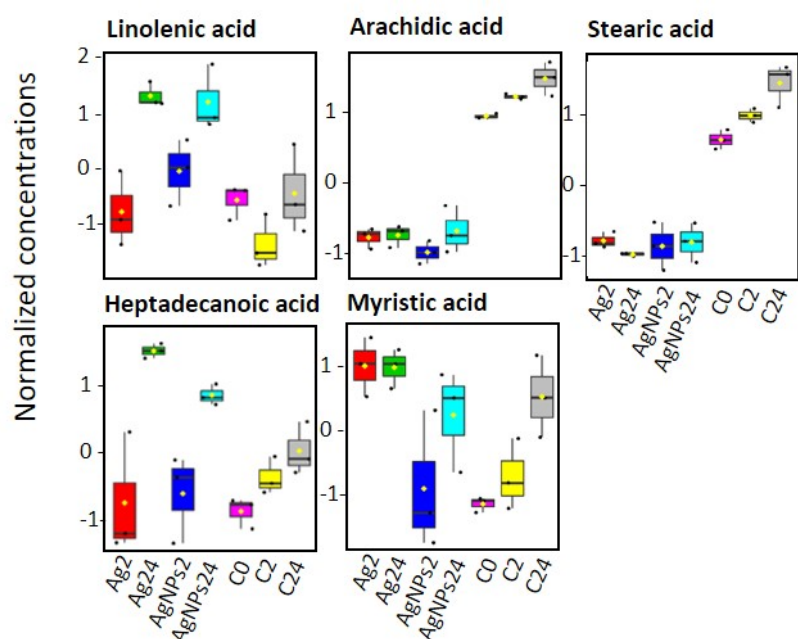

**Figure S3.** Box plots of relative abundance of fatty acids metabolites in *P. malhamensis* treated with  $1\text{mgL}^{-1}$  AgNPs and  $40.7\ \mu\text{gL}^{-1}$  AgNO<sub>3</sub> for 2 and 24h and untreated controls untreated controls at time 0, 2 and 24h. Treatments: Ag2: 2h exposure to  $40.7\ \mu\text{gL}^{-1}$  AgNO<sub>3</sub>; Ag24: 24h-exposure to  $40.7\ \mu\text{gL}^{-1}$  AgNO<sub>3</sub>; AgNPs2: 2h exposure to  $1\ \text{mgL}^{-1}$  AgNPs; AgNPs24: 24h exposure to  $1\ \text{mgL}^{-1}$  AgNPs; C0: unexposed controls at time 0 (beginning of the experiment); C2: unexposed controls at time 2h; C24: unexposed controls at time 24h. Data were normalized with respect to unexposed control at time 0 (C0).

## 5. AgNPs and dissolved Ag induced changes in abundance of carboxylic acids metabolites

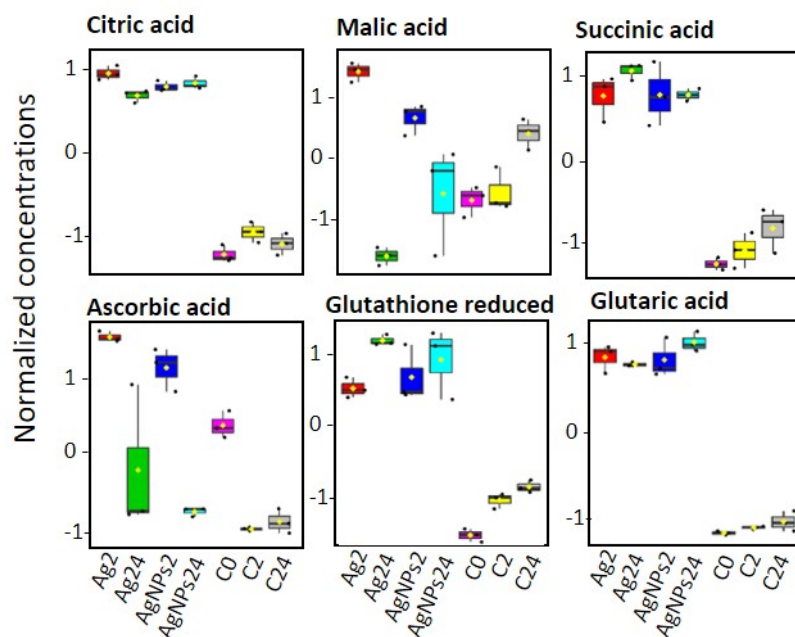

**Figure S4.** Box plots of relative abundance of carboxylic acids and antioxidants in *P. malhamensis* treated with 1mgL<sup>-1</sup> AgNPs and 40.7 μgL<sup>-1</sup> AgNO<sub>3</sub> for 2 and 24h and untreated controls at time 0, 2 and 24h. Treatments: Ag2: 2h exposure to 40.7 μgL<sup>-1</sup> AgNO<sub>3</sub>; Ag24: 24h-exposure to 40.7 μgL<sup>-1</sup> AgNO<sub>3</sub>; AgNPs2: 2h exposure to 1 mgL<sup>-1</sup> AgNPs; AgNPs24: 24h exposure to 1 mgL<sup>-1</sup> AgNPs; C0: unexposed controls at time 0 (beginning of the experiment); C2: unexposed controls at time 2h; C24: unexposed controls at time 24h. Data were normalized with respect to unexposed control at time 0 (C0).

## 6. Metabolic perturbations induced by 2h-exposure to AgNPs and dissolved Ag

**Table S2.** Important features identified by ANOVA and Fisher's post-hoc analysis in *P. malhamensis* exposed to 1 mgL<sup>-1</sup> AgNPs (AgNP 2) and 40.7 µgL<sup>-1</sup> AgNO<sub>3</sub> (Ag 2) and control at 2h exposure. Data were normalized with respect to unexposed control at time 2h (C2).

| Metabolite          | f.value | p.value    | -LOG10(p) | FDR        | Fisher's LSD                            |
|---------------------|---------|------------|-----------|------------|-----------------------------------------|
| Homoserine          | 3169.8  | 8.4536e-10 | 9.073     | 4.2268e-08 | AgNP 2 - Ag 2; Ag 2 - C 2; AgNP 2 - C 2 |
| Tryptophan          | 1969.1  | 3.5204e-09 | 8.4534    | 8.801e-08  | AgNP 2 - Ag 2; C 2 - Ag 2; C 2 - AgNP 2 |
| Phenylalanine       | 1036.5  | 2.404e-08  | 7.6191    | 3.8943e-07 | AgNP 2 - Ag 2; C 2 - Ag 2; C 2 - AgNP 2 |
| Threonine           | 950.42  | 3.1154e-08 | 7.5065    | 3.8943e-07 | Ag 2 - AgNP 2; C 2 - Ag 2; C 2 - AgNP 2 |
| Tyrosine            | 518.32  | 1.9057e-07 | 6.72      | 1.9057e-06 | C 2 - Ag 2; C 2 - AgNP 2                |
| Citric acid         | 455.27  | 2.8054e-07 | 6.552     | 2.3378e-06 | Ag 2 - C 2; AgNP 2 - C 2                |
| Arginine            | 422.27  | 3.5104e-07 | 6.4546    | 2.5074e-06 | Ag 2 - AgNP 2; C 2 - Ag 2; C 2 - AgNP 2 |
| Ornithine           | 286.12  | 1.1172e-06 | 5.9519    | 6.9827e-06 | Ag 2 - C 2; AgNP 2 - C 2                |
| AMP                 | 270.14  | 1.325e-06  | 5.8778    | 7.3609e-06 | Ag 2 - C 2; AgNP 2 - C 2                |
| Asparagine          | 247.61  | 1.7153e-06 | 5.7656    | 8.5767e-06 | C 2 - Ag 2; C 2 - AgNP 2                |
| Glutaric acid       | 175.52  | 4.7456e-06 | 5.3237    | 2.1571e-05 | Ag 2 - C 2; AgNP 2 - C 2                |
| Stearic acid        | 157.47  | 6.5339e-06 | 5.1848    | 2.5451e-05 | C 2 - Ag 2; C 2 - AgNP 2                |
| Ascorbic acid       | 156.79  | 6.6174e-06 | 5.1793    | 2.5451e-05 | Ag 2 - AgNP 2; Ag 2 - C 2; AgNP 2 - C 2 |
| Arachidic acid      | 145.91  | 8.1775e-06 | 5.0874    | 2.8123e-05 | C 2 - Ag 2; C 2 - AgNP 2                |
| Leucine             | 143.61  | 8.5684e-06 | 5.0671    | 2.8123e-05 | AgNP 2 - Ag 2; C 2 - Ag 2; C 2 - AgNP 2 |
| Cytidine            | 139.11  | 9.4081e-06 | 5.0265    | 2.8123e-05 | Ag 2 - C 2; AgNP 2 - C 2                |
| Xanthine            | 138.34  | 9.5617e-06 | 5.0195    | 2.8123e-05 | C 2 - Ag 2; C 2 - AgNP 2                |
| Glutamine           | 120.25  | 1.4423e-05 | 4.8409    | 4.0064e-05 | Ag 2 - AgNP 2; C 2 - Ag 2; C 2 - AgNP 2 |
| Methionine          | 103.98  | 2.205e-05  | 4.6566    | 5.8026e-05 | C 2 - Ag 2; C 2 - AgNP 2                |
| Glycine             | 97.457  | 2.6633e-05 | 4.5746    | 6.6583e-05 | Ag 2 - C 2; AgNP 2 - C 2                |
| Adenine             | 88.468  | 3.5282e-05 | 4.4524    | 8.4005e-05 | Ag 2 - C 2; AgNP 2 - C 2                |
| Guanine             | 84.821  | 3.9863e-05 | 4.3994    | 9.0598e-05 | AgNP 2 - Ag 2; Ag 2 - C 2; AgNP 2 - C 2 |
| Glucose             | 64.064  | 8.9516e-05 | 4.0481    | 0.00018735 | C 2 - Ag 2; C 2 - AgNP 2                |
| Citrulline          | 63.962  | 8.9926e-05 | 4.0461    | 0.00018735 | AgNP 2 - Ag 2; Ag 2 - C 2; AgNP 2 - C 2 |
| Succinic acid       | 45.5    | 0.00023666 | 3.6259    | 0.00047332 | Ag 2 - C 2; AgNP 2 - C 2                |
| Glutathione reduced | 37.266  | 0.00041356 | 3.3835    | 0.00078105 | Ag 2 - C 2; AgNP 2 - C 2                |
| Ethanolamine        | 37.003  | 0.00042177 | 3.3749    | 0.00078105 | Ag 2 - C 2; AgNP 2 - C 2                |
| Histidine           | 34.985  | 0.00049262 | 3.3075    | 0.00087968 | C 2 - Ag 2; C 2 - AgNP 2                |
| Glutamic acid       | 31.655  | 0.00064873 | 3.1879    | 0.0011185  | Ag 2 - AgNP 2; Ag 2 - C 2; AgNP 2 - C 2 |
| Malic acid          | 28.414  | 0.00087092 | 3.06      | 0.0014515  | Ag 2 - AgNP 2; Ag 2 - C 2; AgNP 2 - C 2 |
| CMP                 | 22.573  | 0.0016144  | 2.792     | 0.0026039  | C 2 - Ag 2; C 2 - AgNP 2                |
| Isoleucine          | 19.329  | 0.0024254  | 2.6152    | 0.0037896  | C 2 - Ag 2; C 2 - AgNP 2                |
| Serine              | 13.492  | 0.0060197  | 2.2204    | 0.0091208  | C 2 - Ag 2; C 2 - AgNP 2                |
| Hypoxanthine        | 8.1801  | 0.019321   | 1.714     | 0.028413   | Ag 2 - C 2; AgNP 2 - C 2                |
| Myristic acid       | 7.1776  | 0.025611   | 1.5916    | 0.036587   | Ag 2 - AgNP 2; Ag 2 - C 2               |

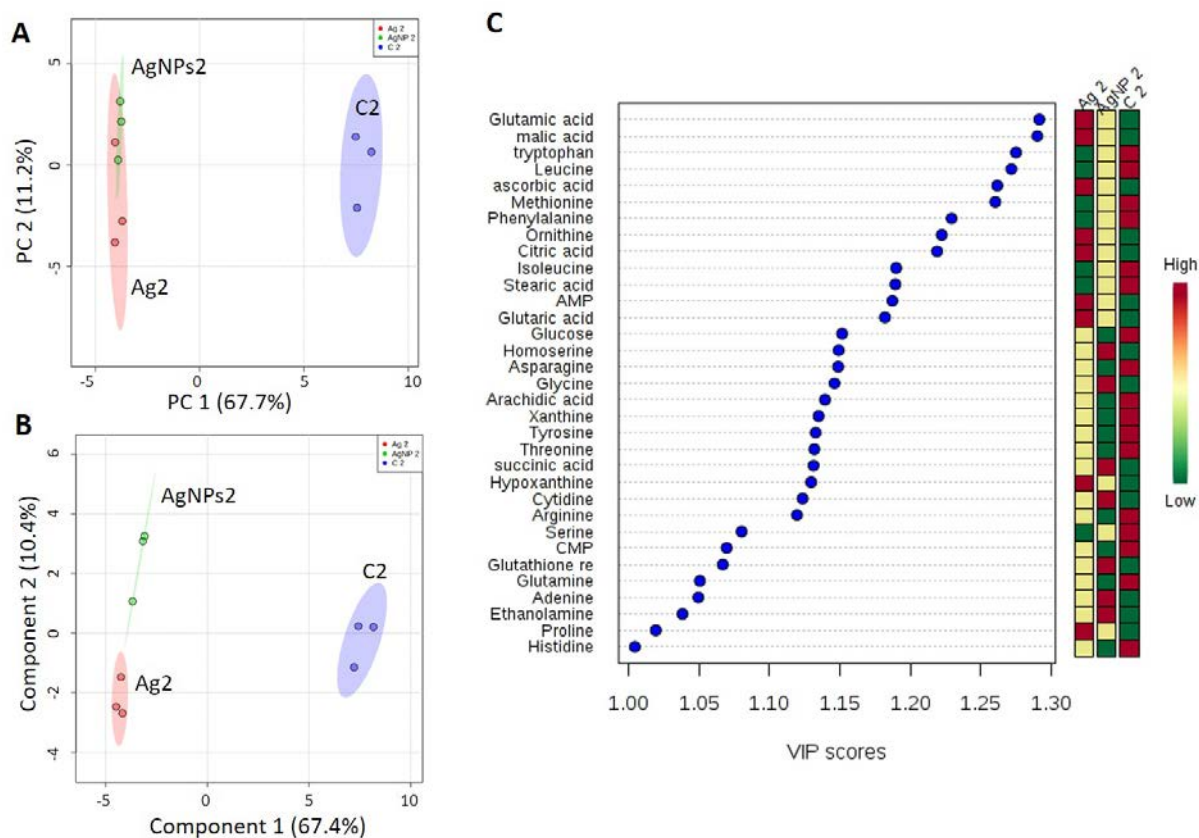

**Figure S5.** (A) Principal component analysis (PCA) and (B) partial least-squares discriminate analysis (PLS-DA) score plots of metabolic profiles in *P. malhamensis* treated with  $1\text{mgL}^{-1}$  AgNPs and  $40.7\ \mu\text{gL}^{-1}$  AgNO<sub>3</sub> for 2h and untreated controls. Data were normalized by using Probabilistic Quotient Normalization by untreated control group at time 2h, log transformed and autoscaled. (C) Important features identified by PLS-DA. The coloured boxes on the right indicate the relative concentrations of the corresponding metabolite in each group under study. VIP scores from PLS-DA analysis of alga discriminating metabolites between unexposed control,  $40.7\ \mu\text{gL}^{-1}$  AgNO<sub>3</sub>; and  $1\ \text{mgL}^{-1}$  AgNPs groups for 2h. Data were normalized with respect to unexposed control at time 2h (C2). The plots were generated by MetaboAnalyst 4.0 (<https://www.metaboanalyst.ca/>)<sup>1</sup>

## 7. Metabolic perturbations induced by 24h-exposure to AgNPs and dissolved Ag

**Table S3.** Important features identified by One-way ANOVA and Fisher's post-hoc analysis in *P. malhamensis* exposed to 1 mgL<sup>-1</sup> AgNPs (AgNP 24) and 40.7 µgL<sup>-1</sup> AgNO<sub>3</sub> (Ag 24) and control at 2h exposure. Data were normalized with respect to unexposed control at time 24h (C2).

| Metabolite          | f.value | p.value    | LOG(p) | FDR        | Fisher's LSD                                    |
|---------------------|---------|------------|--------|------------|-------------------------------------------------|
| Homoserine          | 3351.6  | 7.1524e-10 | 9.1455 | 3.5762e-08 | Ag 24 - C 24; AgNPs 24 - C 24                   |
| Arginine            | 489.35  | 2.2623e-07 | 6.6455 | 4.4063e-06 | C 24 - Ag 24; C 24 - AgNPs 24                   |
| Lysine              | 458.58  | 2.7455e-07 | 6.5614 | 4.4063e-06 | Ag 24 - AgNPs 24; Ag 24 - C 24; AgNPs 24 - C 24 |
| Asparagine          | 421.68  | 3.525e-07  | 6.4528 | 4.4063e-06 | C 24 - Ag 24; C 24 - AgNPs 24                   |
| Glutaric acid       | 357.68  | 5.7542e-07 | 6.24   | 5.2466e-06 | AgNPs 24 - Ag 24; Ag 24 - C 24; AgNPs 24 - C 24 |
| Phenylalanine       | 347.03  | 6.2959e-07 | 6.2009 | 5.2466e-06 | C 24 - Ag 24; C 24 - AgNPs 24                   |
| Ornithine           | 272.4   | 1.2927e-06 | 5.8885 | 8.1895e-06 | Ag 24 - C 24; AgNPs 24 - C 24                   |
| Histidine           | 271.15  | 1.3103e-06 | 5.8826 | 8.1895e-06 | C 24 - Ag 24; C 24 - AgNPs 24                   |
| Citric acid         | 238.47  | 1.9177e-06 | 5.7172 | 9.6542e-06 | Ag 24 - C 24; AgNPs 24 - C 24                   |
| Threonine           | 237.92  | 1.9308e-06 | 5.7143 | 9.6542e-06 | C 24 - Ag 24; C 24 - AgNPs 24                   |
| Stearic acid        | 173.56  | 4.906e-06  | 5.3093 | 2.23e-05   | C 24 - Ag 24; C 24 - AgNPs 24                   |
| Citrulline          | 153.96  | 6.9827e-06 | 5.156  | 2.9095e-05 | Ag 24 - C 24; AgNPs 24 - C 24                   |
| Adenine             | 136.91  | 9.8593e-06 | 5.0062 | 3.792e-05  | Ag 24 - C 24; AgNPs 24 - C 24                   |
| Xanthine            | 119.36  | 1.4737e-05 | 4.8316 | 5.0268e-05 | AgNPs 24 - Ag 24; C 24 - Ag 24; C 24 - AgNPs 24 |
| Glutamic acid       | 118.16  | 1.5182e-05 | 4.8187 | 5.0268e-05 | AgNPs 24 - Ag 24; Ag 24 - C 24; AgNPs 24 - C 24 |
| Succinic acid       | 113.5   | 1.7074e-05 | 4.7677 | 5.0268e-05 | Ag 24 - C 24; AgNPs 24 - C 24                   |
| Arachidic acid      | 113.06  | 1.7269e-05 | 4.7627 | 5.0268e-05 | C 24 - Ag 24; C 24 - AgNPs 24                   |
| Serine              | 111.27  | 1.8097e-05 | 4.7424 | 5.0268e-05 | C 24 - Ag 24; C 24 - AgNPs 24                   |
| Ethanolamine        | 102.61  | 2.2919e-05 | 4.6398 | 6.0312e-05 | AgNPs 24 - Ag 24; Ag 24 - C 24; AgNPs 24 - C 24 |
| Glutamine           | 84.151  | 4.0789e-05 | 4.3895 | 9.7855e-05 | AgNPs 24 - Ag 24; C 24 - Ag 24; C 24 - AgNPs 24 |
| Tyrosine            | 83.931  | 4.1099e-05 | 4.3862 | 9.7855e-05 | C 24 - Ag 24; C 24 - AgNPs 24                   |
| CMP                 | 79.3    | 4.8436e-05 | 4.3148 | 0.00011008 | AgNPs 24 - Ag 24; C 24 - Ag 24; C 24 - AgNPs 24 |
| Adenosine           | 67.391  | 7.7412e-05 | 4.1112 | 0.00016829 | C 24 - Ag 24; C 24 - AgNPs 24                   |
| Tryptophan          | 53.745  | 0.00014777 | 3.8304 | 0.00030785 | C 24 - Ag 24; C 24 - AgNPs 24                   |
| Leucine             | 51.553  | 0.0001663  | 3.7791 | 0.00033261 | C 24 - Ag 24; C 24 - AgNPs 24                   |
| Glutathione reduced | 44.171  | 0.00025724 | 3.5897 | 0.0004947  | Ag 24 - C 24; AgNPs 24 - C 24                   |
| Cytidine            | 39.948  | 0.00034083 | 3.4675 | 0.00063118 | AgNPs 24 - Ag 24; Ag 24 - C 24; AgNPs 24 - C 24 |
| Aspartic acid       | 35.732  | 0.00046466 | 3.3329 | 0.00082976 | Ag 24 - C 24; AgNPs 24 - C 24                   |
| Glycine             | 34.722  | 0.00050303 | 3.2984 | 0.00086728 | Ag 24 - C 24; AgNPs 24 - C 24                   |
| Heptadecanoic acid  | 29.312  | 0.00080034 | 3.0967 | 0.0013339  | Ag 24 - AgNPs 24; Ag 24 - C 24; AgNPs 24 - C 24 |
| Alanine             | 20.506  | 0.0020789  | 2.6822 | 0.0033531  | AgNPs 24 - Ag 24; C 24 - Ag 24; C 24 - AgNPs 24 |
| Proline             | 18.881  | 0.0025772  | 2.5889 | 0.0040268  | Ag 24 - C 24; AgNPs 24 - C 24                   |
| Thymine             | 18.017  | 0.0029083  | 2.5364 | 0.0044065  | C 24 - Ag 24; C 24 - AgNPs 24                   |
| Hypoxanthine        | 17.472  | 0.0031467  | 2.5021 | 0.0046275  | Ag 24 - AgNPs 24; Ag 24 - C 24; AgNPs 24 - C 24 |
| AMP                 | 16.182  | 0.0038253  | 2.4173 | 0.0054647  | AgNPs 24 - Ag 24; Ag 24 - C 24; AgNPs 24 - C 24 |
| Uracil              | 14.135  | 0.0053665  | 2.2703 | 0.0074534  | C 24 - Ag 24; C 24 - AgNPs 24                   |
| Methionine          | 13.679  | 0.0058189  | 2.2352 | 0.0078633  | C 24 - Ag 24; C 24 - AgNPs 24                   |
| Linolenic acid      | 12.171  | 0.0077322  | 2.1117 | 0.010174   | Ag 24 - C 24; AgNPs 24 - C 24                   |
| Glucose             | 11.597  | 0.0086811  | 2.0614 | 0.01113    | C 24 - Ag 24; C 24 - AgNPs 24                   |
| Isoleucine          | 11.328  | 0.0091797  | 2.0372 | 0.011475   | Ag 24 - C 24; AgNPs 24 - C 24                   |
| Malic acid          | 8.5007  | 0.01775    | 1.7508 | 0.021646   | C 24 - Ag 24                                    |

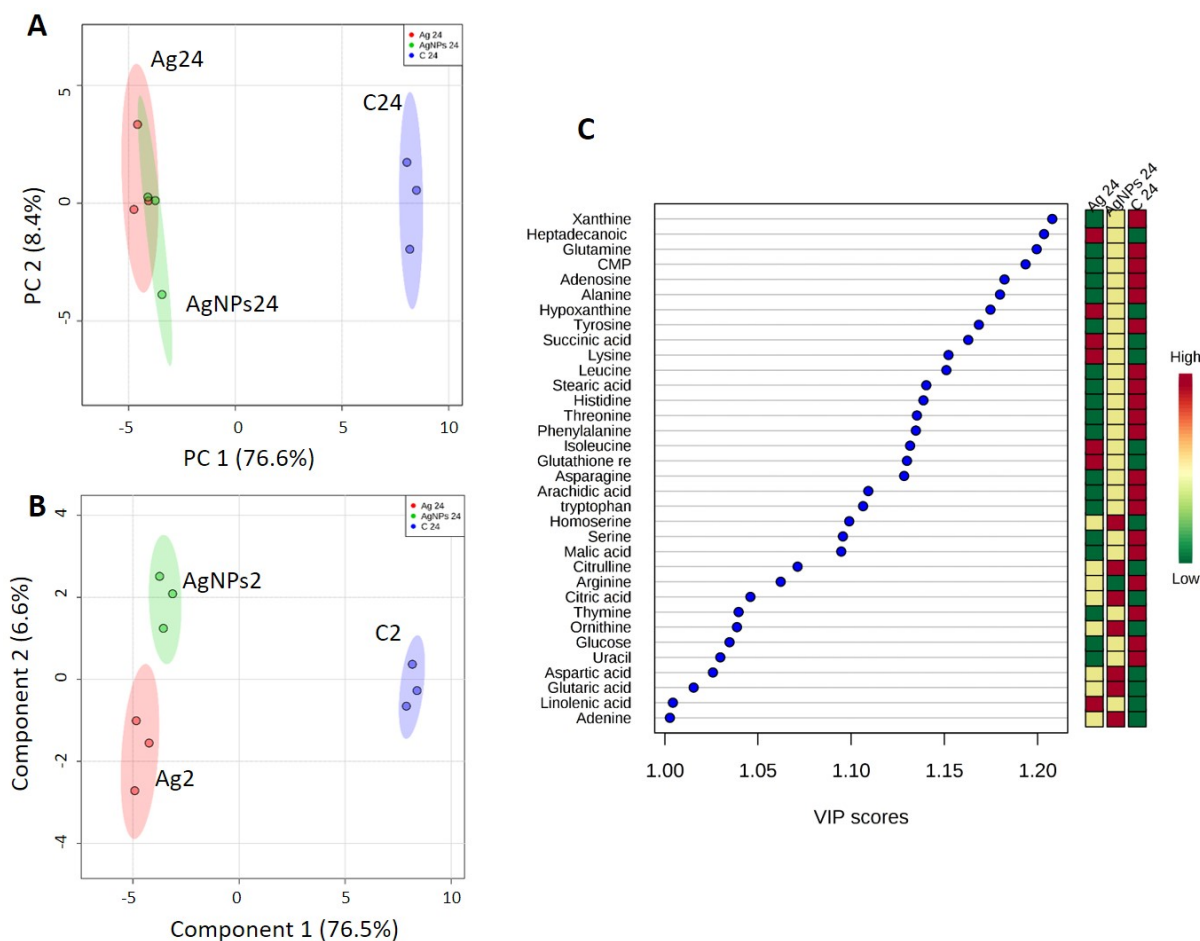

**Figure S6.** (A) Principal component analysis (PCA) and (B) partial least-squares discriminate analysis (PLS-DA) score plots of metabolic profiles in *P. malhamensis* treated with  $1\text{mgL}^{-1}$  AgNPs and  $40.7\ \mu\text{gL}^{-1}$  AgNO<sub>3</sub> for 24h and untreated controls. Data were normalized by using Probabilistic Quotient Normalization by untreated control group at time 24h, log transformed and autoscaled. (C) Important features identified by PLS-DA. The colored boxes on the right indicate the relative concentrations of the corresponding metabolite in each group under study. VIP scores from PLS-DA analysis showing the discriminating metabolites between unexposed control,  $40.7\ \mu\text{gL}^{-1}$  AgNO<sub>3</sub>; and  $1\ \text{mgL}^{-1}$  AgNPs. The plot were generated by MetaboAnalyst 4.0 (<https://www.metaboanalyst.ca/>)<sup>1</sup>

## 8. Metabolites common and specific for the two durations of exposure

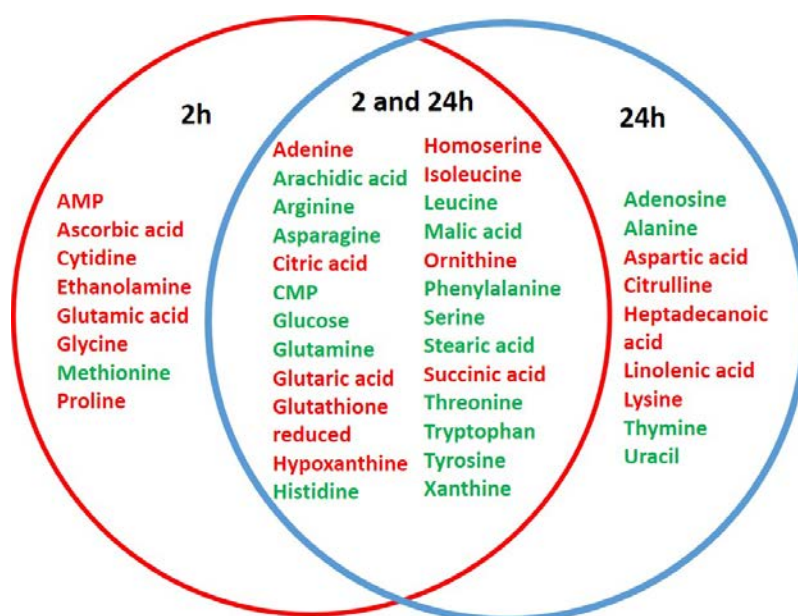

**Figure S7.** Metabolites that were significantly affected at 2 or 24h exposure and those that were common for two exposure durations identified by PLS-DA. Green and red colour represent the depleted and accumulated metabolites.

Twenty-five metabolites common for the two exposure times (Fig. S7): adenine, arachidic acid, arginine, asparagine, citric acid, CMP, glucose, glutamine, glutaric acid, glutathione reduced, hypoxanthine, histidine, homoserine, isoleucine, leucine, malic acid, ornithine, phenylalanine, serine, stearic acid, succinic acid, threonine, tryptophan, tyrosine and xanthine. AMP, ascorbic acid, cytidine, ethanolamine, glutamic acid, glycine, methionine and proline were specifically dysregulated at 2h exposure, while adenosine, aspartic acid, citrulline, heptadecanoic acid, linolenic acid, thymine and uracil at 24 h exposure. In addition, the ANOVA revealed that at 2h exposure 11 metabolites were significantly altered, relative to the control, by AgNPs and dissolved Ag: ascorbic acid, arginine, citrulline, glutamine, glutamic acid, guanine, homoserine, phenylalanine, threonine, tryptophan, and at 24h exposure: alanine, AMP, CMP, cytidine, glucose, glutamine, glutamic acid, glutaric acid, hypoxanthine, histidine, heptadecanoic acid and lysine.

## 9. Characteristics of stock suspension of AgNPs

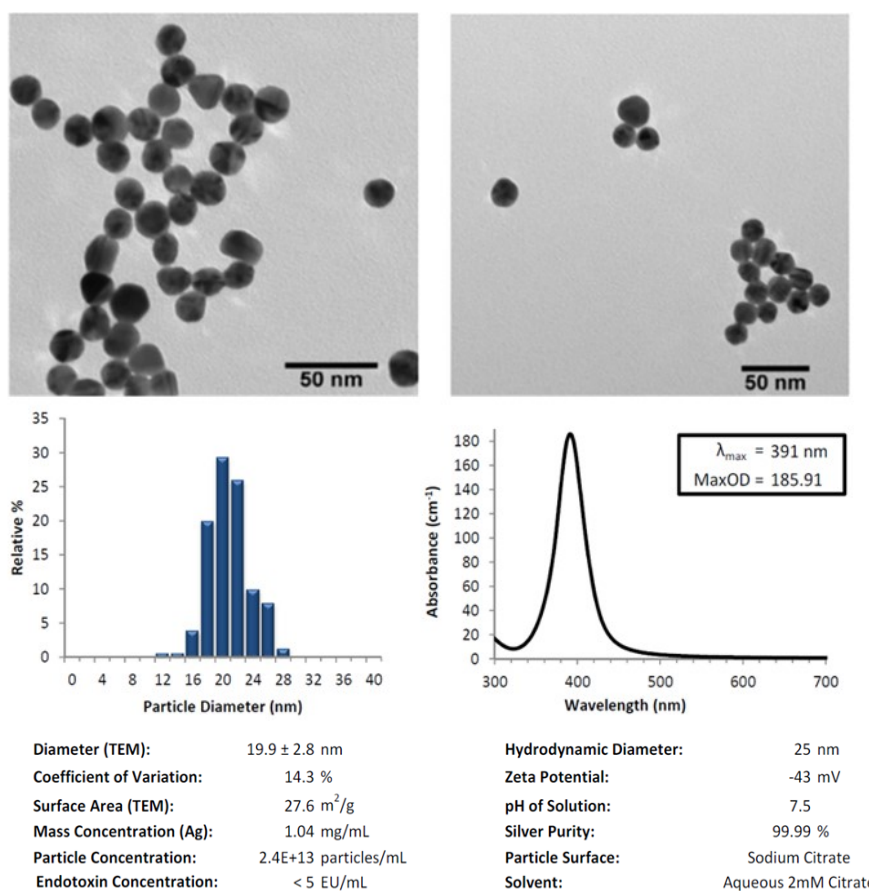

**Figure S8.** Characteristics of stock suspension of AgNPs according to the manufacturer.



## 10. Composition of the Waris-H medium

**Table S4.** Composition of the Waris-H medium (pH  $7.0 \pm 0.1$ ) used in this study.

| <b>Compounds</b>                                      | <b>Final Concentration</b> | <b>Compounds</b>                         | <b>Final Concentration</b> |
|-------------------------------------------------------|----------------------------|------------------------------------------|----------------------------|
| KNO <sub>3</sub>                                      | 1.0 mM                     | Na <sub>2</sub> EDTA • 2H <sub>2</sub> O | 8.06 μM                    |
| MgSO <sub>4</sub> • 7H <sub>2</sub> O                 | 81 μM                      | FeSO <sub>4</sub> • 7 H <sub>2</sub> O   | 17.9 μM                    |
| (NH <sub>4</sub> ) <sub>2</sub> HPO <sub>4</sub>      | 0.15 mM                    | MnCl <sub>2</sub> • 4H <sub>2</sub> O    | 0.73 μM                    |
| Ca(NO <sub>3</sub> ) • 4 H <sub>2</sub> O             | 0.42 mM                    | ZnSO <sub>4</sub> • 7H <sub>2</sub> O    | 73 nM                      |
| HEPES                                                 | 1 mM                       | CoCl <sub>2</sub> • 6H <sub>2</sub> O    | 16.8 nM                    |
| H <sub>3</sub> BO <sub>3</sub>                        | 18.43 μM                   | Vitamin B <sub>12</sub>                  | 0.15 nM                    |
| Na <sub>2</sub> SiO <sub>3</sub> • 9 H <sub>2</sub> O | 0.5 mM                     | Thiamine · HCl                           | 300 nM                     |
| Yeast extract                                         | 0.05%                      | Biotin                                   | 4.1 nM                     |
| Glucose                                               | 0.05%                      | Niacinamide                              | 0.8 nM                     |
| Beef extract                                          | 0.05%                      | Peptone                                  | 0.4%                       |

## 11. Determination of AgNPs dissolution in the exposure medium

Suspensions containing 0.5, 1 and 5 mgL<sup>-1</sup> AgNPs were prepared by diluting the stock suspension in the Waris-H medium. The concentrations of the dissolved Ag in the AgNPs suspensions were determined at 2 and 24 h. To this end the aliquots of 6 mL of the suspensions were centrifuged at 165 000g for 4 h (Beckman Coulter, optimal L-100 × P ultracentrifuge) according to Beer et al. <sup>2</sup>. 1mL of the supernatant was collected, acidified with ultrapure HNO<sub>3</sub> to a final concentration of 1% (v/v). Ag concentrations in the supernatant were measured by inductively coupled plasma mass spectrometry (ICP-MS). The percentage of the dissolved Ag, calculated as a ratio of Ag concentration present in the supernatant to the total Ag concentration in the suspensions, is given in Table S2.

**Table S5.** Percentage of dissolved silver in AgNPs suspensions: mean and standard deviation (SD).

| AgNPs<br>mg L <sup>-1</sup> | Dissolved Ag (%) |     |      |     |
|-----------------------------|------------------|-----|------|-----|
|                             | 2h               |     | 24h  |     |
|                             | Mean             | SD  | Mean | SD  |
| 0.5                         | 3.6              | 0.5 | 4.8  | 0.6 |
| 1                           | 3.4              | 0.7 | 4.7  | 0.5 |
| 5                           | 0.2              | 0.1 | 0.4  | 0.2 |

## 12. Silver cellular burden of *P. malhamensis* exposed to AgNPs for 2 and 24h

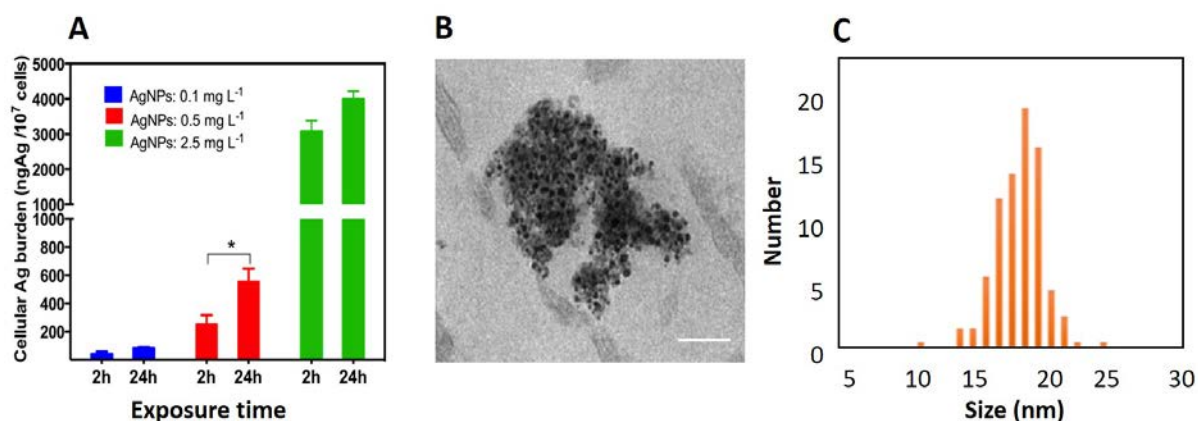

**Figure S9.** (A) Silver cellular burden at increasing AgNPs concentrations at 2 and 24h-exposure; (B) TEM image showing aggregates of AgNPs in the food vacuoles of *P. malhamensis*; (C) Size distribution of the aggregate obtained from the TEM image, present at Fig. S9B for algae exposed to 1 mg L<sup>-1</sup> AgNPs during 24h. Asterisk indicates a significant difference between treatments obtained by two-way analysis of variance (ANOVA) followed by a Sidak's multiple comparisons test ( $p < 0.05$ ).

### 13. Effect of AgNPs and dissolved Ag on algal growth

The algal cells at the mid-exponential phase were harvested by gently centrifugation and re-suspended in the modified Waris-H medium enriched with the AgNPs concentration ranging from 0.1 to 10 mgL<sup>-1</sup> for 144 h. Cell numbers were followed and used to calculate the percentage of growth inhibition at different AgNPs concentrations over this time period. The experiments were performed in triplicates. The concentration inducing the growth inhibition in 50% of the algal population, EC<sub>50</sub> (144h) of AgNPs was 7.76 mg L<sup>-1</sup>. Exposure to 1 mgL<sup>-1</sup> AgNPs resulted in a growth inhibition of 15% of the cells. The growth inhibition was also controlled when cells were exposed to 40.7µgL<sup>-1</sup> AgNO<sub>3</sub>, a concentration corresponding to the dissolved Ag in the suspensions of 1 mg L<sup>-1</sup> AgNPs. At this concentration below 2% of the cells were affected. Based on these results we expect no effect on the algae growth under the selected exposure conditions of 2 and 24h duration and 1mgL<sup>-1</sup> AgNPs and 40.7µgL<sup>-1</sup> AgNO<sub>3</sub>.

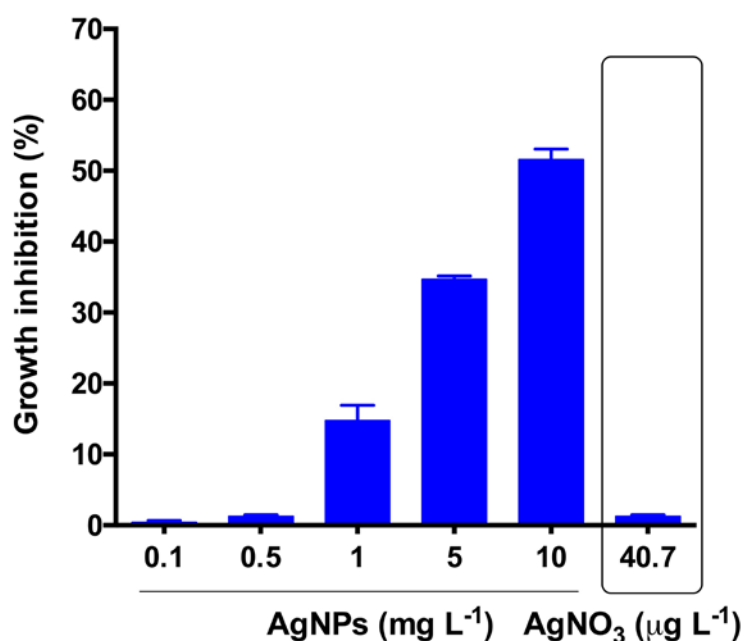

**Figure S10.** Growth inhibition of *P. malhamensis* exposed to AgNPs and AgNO<sub>3</sub> corresponding to the dissolved Ag in the 1 mg L<sup>-1</sup> suspension of AgNPs or 40.7 µgL<sup>-1</sup> AgNO<sub>3</sub>. Error bars represent on standard deviation of three independent bioassays.

#### 14. Determination of the cellular ROS upon AgNPs and dissolved Ag exposure

The generation of the cellular ROS was examined at 2h and 24h with the cell density of  $1 \times 10^6$  cells  $\text{mL}^{-1}$  using the fluorescent probe CellROX® green (Life Technologies Europe B.V., Zug, Switzerland), as previously detailed<sup>3,4</sup>. Briefly,  $5 \mu\text{M}$  CellROX green were employed to 500  $\mu\text{L}$  aliquots of each test replicate separately for 30 minutes in the dark with no intermediate washing steps. Unexposed algae were used as negative control, while algae exposed to 5 mM  $\text{H}_2\text{O}_2$  for 30 min were used as positive control. Measurements were performed with a BD Accuri C6 flow cytometer equipped with a CSampler (BD Biosciences, San Jose, CA). 488-nm argon excitation laser and fluorescence detection channels with band pass emission filters at  $530 \pm 15$  nm (FL1),  $585 \pm 20$  nm (FL2) and a long pass emission filter for  $>670$  nm (FL3) were used. Data acquisition and analysis were performed with the BD Accuri C6 Software 264.15. Percentage of cells with enhanced ROS in different treatments is present at Figs. S11 and S12A.

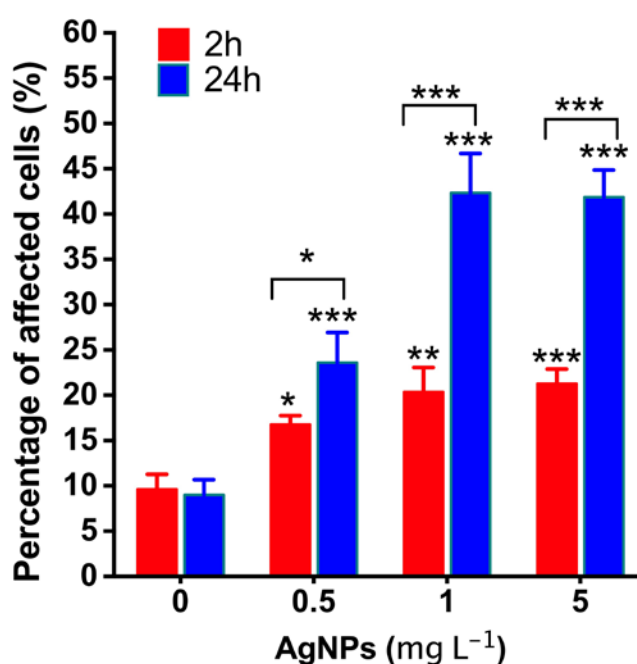

**Figure S11.** Percentage of cells affected by enhanced reactive oxygen species generation in the presence of AgNPs at 0.5, 1 and 5  $\text{mg L}^{-1}$  at 2h and 24h-exposure. Asterisks indicate a significant difference between treatments obtained by two-way analysis of variance (ANOVA) followed by a Sidak's multiple comparisons test: \* $p < 0.05$ ; \*\* $p < 0.01$ ; \*\*\* $p < 0.001$ .

## 15. Determination of the lipid peroxidation upon AgNPs and dissolved Ag exposure

Cellular lipid peroxidation induced by Ag-treatments was determined following malondialdehyde (MDA) production MDA-assay kit (Sigma-Aldrich, St Louis, USA). The kit is based on the reaction of MDA with thiobarbituric acid, giving a product with a characteristic UV-visible absorbance peak at 532 nm, which was measured by spectrophotometry according to the manufacturer's instruction. The absorbance intensity at 532 nm is directly related to the amount of MDA formed. The assay was performed with 96 well microplate reader with a total volume of 200  $\mu$ L of sample (Synergy H1, Biotek®, USA). The data were treated with Gen5 Software. The results are present in Fig. S12B.

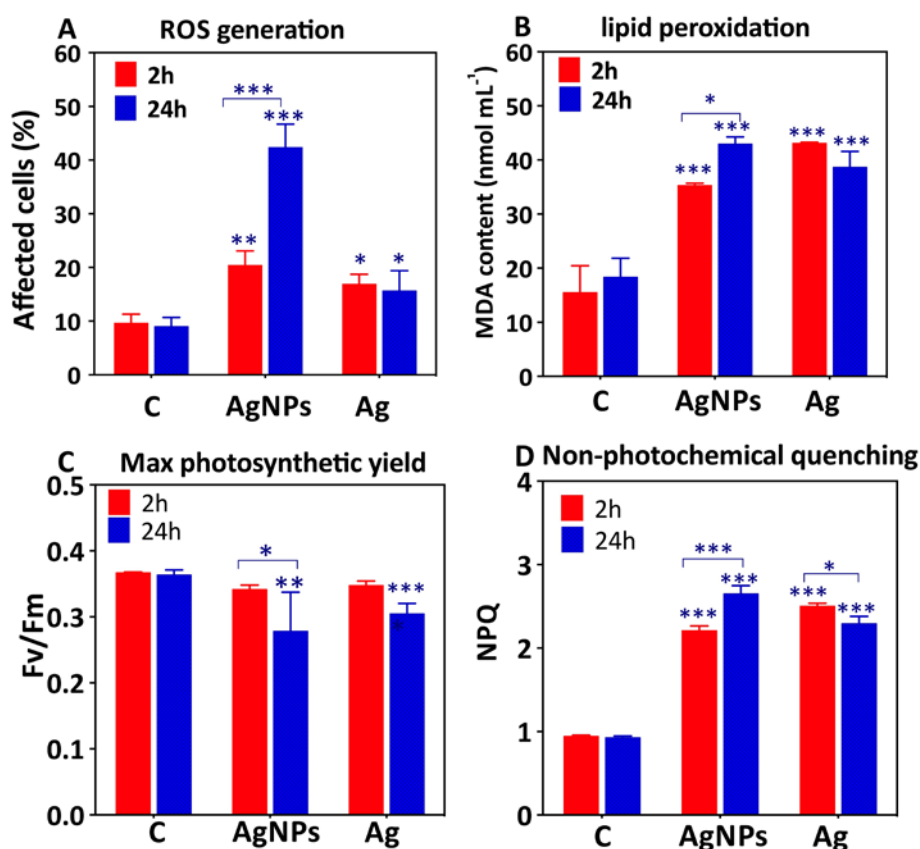

**Figure S12.** Effect of  $1.0 \text{ mg L}^{-1}$  AgNPs or  $40.7 \text{ } \mu\text{g L}^{-1}$  AgNO<sub>3</sub> exposure on physiology of *P. malhamensis*. (A): ROS generation, determined by CellRox® Green stain and FCM; (B) lipid peroxidation, assessed by MDA test; (C) Maximum quantum yield of photosystem II (Fv/Fm); and (D) non-photochemical quenching (NPQ). Asterisks indicate a significant difference between treatments obtained by two-way analysis of variance (ANOVA) followed by a Sidak's multiple comparisons test: \* $p < 0.05$ ; \*\*\*  $p < 0.01$ ; \*\*\*\*  $p < 0.001$ .

## **16. Determination of photosynthetic activity upon AgNPs and dissolved Ag exposure**

Changes in the photosynthetic activities of *P. malhamensis* induced by Ag-treatments were measured using a Multi-PAM (Walz, Germany). Photosynthetic parameters including maximal efficiency of PSII (Fv/Fm) and non-photochemical quenching (NPQ), corresponding to the dissipation of the excess of energy as heat loss from PSII, were measured after 2h and 24h after dark acclimation for 20 min. The modulation of these parameters is a well-known indicator for stress induced by different biotic and abiotic factors. The results are present in Fig. S12C and D.

## 17. Metabolites and MS parameters for LC-MS targeted metabolomics

**Table S6.** List of metabolites and the MS parameters for LC-MS targeted metabolomics

| Compound                         | Retention time (min) | Precursor ion (m/z) | Product ions    |                      |                |                      |                |
|----------------------------------|----------------------|---------------------|-----------------|----------------------|----------------|----------------------|----------------|
|                                  |                      |                     | Quant ion (m/z) | Collision energy (V) | Qual ion (m/z) | Collision energy (V) | Fragmentor (V) |
| <b>Amino acids</b>               |                      |                     |                 |                      |                |                      |                |
| Phenylalanine                    | 2.95                 | 166.1               | 120.1           | 13                   | 103            | 29                   | 80             |
| Leucine                          | 3.38                 | 132.1               | 86.1            | 9                    | 30.2           | 17                   | 75             |
| Tryptophan                       | 3.41                 | 205.1               | 188             | 8                    | 146            | 20                   | 80             |
| Isoleucine                       | 3.75                 | 132.1               | 86.1            | 9                    | 44.2           | 25                   | 75             |
| Methionine                       | 4.22                 | 150.1               | 104             | 9                    | 56.1           | 17                   | 75             |
| Valine                           | 4.95                 | 118.1               | 72.1            | 9                    | 55.1           | 25                   | 70             |
| Proline                          | 4.96                 | 116.1               | 70.1            | 17                   | 43.2           | 37                   | 75             |
| Tyrosine                         | 5.01                 | 182.1               | 136.1           | 13                   | 91.1           | 33                   | 85             |
| Cysteine                         | 5.63                 | 122                 | 59.1            | 29                   | 76             | 13                   | 65             |
| Alanine                          | 6.61                 | 90.1                | 44.2            | 9                    | 45.3           | 40                   | 40             |
| Threonine                        | 6.72                 | 120.1               | 74.1            | 9                    | 56.1           | 17                   | 75             |
| Homoserine                       | 6.91                 | 120.1               | 74.1            | 9                    | 56.1           | 21                   | 70             |
| Glycine                          | 7.00                 | 76                  | 30.3            | 12                   | -              | -                    | 35             |
| Glutamine                        | 7.23                 | 147.1               | 84.1            | 17                   | 130.1          | 9                    | 80             |
| Serine                           | 7.26                 | 106.1               | 88.1            | 8                    | 42.2           | 24                   | 67             |
| Asparagine                       | 7.31                 | 133.1               | 87.1            | 5                    | 74             | 17                   | 75             |
| Glutamic acid                    | 7.68                 | 148.1               | 84.1            | 17                   | 130            | 5                    | 75             |
| Citrulline                       | 7.89                 | 176.1               | 159.1           | 9                    | 70.1           | 25                   | 80             |
| Aspartic acid                    | 8.38                 | 134                 | 88.1            | 9                    | 74             | 13                   | 70             |
| Histidine                        | 9.06                 | 156.1               | 110.1           | 13                   | 83.1           | 29                   | 90             |
| Arginine                         | 9.54                 | 175.1               | 70.1            | 24                   | 60.1           | 12                   | 100            |
| Lysine                           | 10.16                | 147.1               | 84.1            | 17                   | 130.1          | 9                    | 75             |
| Ornithine                        | 10.28                | 133.1               | 116             | 8                    | 70             | 20                   | 76             |
| <b>Antioxidants</b>              |                      |                     |                 |                      |                |                      |                |
| Glutathione reduced              | 1.22                 | 308.1               | 179             | 12                   | 162            | 16                   | 91             |
| Chlorogenic acid                 | 6.19                 | 353.1               | 191.1           | 16                   | -              | -                    | 102            |
| Curcumin                         | 6.33                 | 367.1               | 217.1           | 8                    | 149.1          | 16                   | 112            |
| Vanillic acid                    | 6.60                 | 167                 | 152.1           | 12                   | 108            | 20                   | 82             |
| 2-hydroxycinnamic acid           | 7.37                 | 163                 | 119.1           | 12                   | 117.1          | 28                   | 81             |
| L-Dehydroascorbic acid           | 8.00                 | 173                 | 158.1           | 12                   | -              | -                    | 174            |
| 4-(Trifluoromethyl)cinnamic acid | 8.26                 | 215                 | 171.1           | 12                   | 151.1          | 20                   | 87             |
| $\alpha$ -Tocopherol             | 11.00                | 431.4               | 165.1           | 24                   | 69.1           | 40                   | 142            |
| <b>Organic Acids/Phenolics</b>   |                      |                     |                 |                      |                |                      |                |
| glycolic acid                    | 2.04                 | 75                  | 47              | 8                    | 72.9           | 8                    | 46             |
| malic acid                       | 2.07                 | 133                 | 114.9           | 8                    | 71             | 16                   | 76             |



|                                |      |       |       |    |       |    |     |
|--------------------------------|------|-------|-------|----|-------|----|-----|
| Citric acid                    | 2.17 | 191   | 110.8 | 12 | 86.9  | 16 | 82  |
| lactic acid                    | 2.23 | 89.1  | 43.1  | 4  | -     | -  | 66  |
| succinic acid                  | 2.31 | 117   | 72.9  | 12 | 98.9  | 8  | 66  |
| Pyruvic acid                   | 2.36 | 87    | 43.1  | 4  | -     | -  | 66  |
| Gallic acid                    | 2.49 | 169   | 125.1 | 12 | 79    | 24 | 92  |
| Glutaric acid                  | 2.62 | 131   | 86.9  | 12 | 112.9 | 8  | 71  |
| fumaric acid                   | 2.67 | 115   | 70.9  | 4  | -     | -  | 56  |
| ascorbic acid                  | 2.67 | 175   | 114.9 | 12 | -     | -  | 87  |
| Caffeic acid                   | 4.58 | 179   | 135.1 | 16 | -     | -  | 94  |
| p-coumaric acid                | 4.87 | 163   | 119.1 | 16 | 93.1  | 36 | 87  |
| ferulic acid                   | 5.09 | 193.1 | 134.1 | 16 | 178.1 | 12 | 87  |
| benzoic acid                   | 5.21 | 121   | 77.1  | 12 | -     | -  | 77  |
| Salicylic acid                 | 5.96 | 137   | 93    | 20 | 65.1  | 36 | 82  |
| <b>Amine</b>                   |      |       |       |    |       |    |     |
| Ethanolamine                   | 1.23 | 62.1  | 44.2  | 8  | 45.2  | 16 | 66  |
| 2,4-Diaminoanisole             | 1.25 | 139.1 | 124   | 16 | 79    | 32 | 71  |
| 4,4'-Diaminodiphenylmethane    | 1.27 | 199.1 | 106   | 28 | 77    | 40 | 127 |
| 4,4'-Oxydianiline              | 1.28 | 201.1 | 108   | 24 | 80    | 40 | 117 |
| m-Phenylenediamine             | 1.30 | 109.1 | 92    | 16 | 65    | 28 | 76  |
| Aniline                        | 1.57 | 94.1  | 77    | 20 | 51.1  | 36 | 40  |
| o-Anisidine                    | 1.59 | 124.1 | 109   | 16 | 80    | 36 | 61  |
| o-Toluidine                    | 1.67 | 108.1 | 91    | 20 | 65    | 32 | 91  |
| 4-Chloroaniline                | 2.17 | 128   | 93    | 20 | 75    | 40 | 86  |
| 2,6-Dimethylaniline            | 2.18 | 122.1 | 105   | 16 | 77    | 32 | 86  |
| 2-Methyl-5-nitroaniline        | 2.38 | 153.1 | 107   | 20 | 89    | 40 | 71  |
| Diphenylamine                  | 3.41 | 170.1 | 93    | 28 | 65.1  | 36 | 132 |
| <b>Sugar and Sugar Alcohol</b> |      |       |       |    |       |    |     |
| Ribose                         | 1.18 | 149   | 89    | 4  | -     | -  | 76  |
| L-fucose                       | 1.35 | 163.1 | 89    | 0  | 59.1  | 12 | 76  |
| Arabinose                      | 1.43 | 149   | 89    | 4  | -     | -  | 76  |
| Xylose                         | 1.43 | 149   | 89    | 4  | -     | -  | 76  |
| Ribitol                        | 1.61 | 151.1 | 89    | 8  | 71.1  | 16 | 97  |
| Xylitol                        | 1.61 | 151.1 | 89    | 12 | -     | -  | 97  |
| Fructose                       | 1.72 | 179.1 | 89    | 4  | -     | -  | 71  |
| Mannose                        | 1.93 | 179.1 | 89    | 16 | -     | -  | 71  |
| Galactose                      | 2.19 | 179.1 | 89    | 16 | -     | -  | 71  |
| Glucose                        | 2.19 | 179.1 | 89    | 16 | -     | -  | 71  |
| Sucrose                        | 3.81 | 341.1 | 179   | 20 | -     | -  | 148 |
| Maltose                        | 4.26 | 341.1 | 161.1 | 4  | -     | -  | 123 |
| Lactose                        | 4.57 | 341.1 | 161.1 | 4  | -     | -  | 123 |
| Trehalose                      | 4.79 | 341.1 | 179   | 12 | -     | -  | 154 |
| Raffinose                      | 6.03 | 503.2 | 179   | 20 | 221   | 32 | 174 |
| Galactinol                     | 6.17 | 341.1 | 179   | 12 | -     | -  | 133 |

| <b>Fatty Acids</b>          |      |       |       |    |      |    |     |
|-----------------------------|------|-------|-------|----|------|----|-----|
| Linolenic acid              | 4.33 | 323.2 | 277.1 | 4  | 45.1 | 40 | 87  |
| myristic acid               | 4.64 | 273.2 | 227.2 | 4  | 45.1 | 8  | 56  |
| Linoleic acid               | 4.91 | 325.2 | 279.1 | 4  | 45.1 | 28 | 87  |
| Pentadecanoic acid          | 5.17 | 287.2 | 241.2 | 4  | 45.1 | 16 | 71  |
| Palmitic acid               | 5.70 | 301.2 | 255.2 | 4  | 45.1 | 20 | 36  |
| Heptadecanoic acid          | 6.14 | 315.3 | 269.2 | 4  | 45.2 | 28 | 76  |
| Stearic acid                | 6.49 | 329.3 | 283.2 | 4  | 45.1 | 32 | 72  |
| Arachidic acid              | 7.05 | 357.3 | 311.3 | 4  | 45.1 | 32 | 82  |
| <b>Nucleobase/side/tide</b> |      |       |       |    |      |    |     |
| Cytosine                    | 1.94 | 112.1 | 95    | 20 | 40.1 | 20 | 84  |
| CMP                         | 2.76 | 324.1 | 112   | 16 | 95   | 40 | 84  |
| Cytidine                    | 2.90 | 244.1 | 112   | 12 | 95   | 40 | 84  |
| Adenine                     | 3.08 | 136.1 | 119   | 24 | 92   | 32 | 84  |
| Guanine                     | 3.34 | 152.1 | 135   | 20 | 110  | 24 | 84  |
| Uracil                      | 3.52 | 113   | 70    | 10 | 96   | 20 | 84  |
| AMP                         | 4.84 | 348.1 | 136   | 20 | 97   | 32 | 84  |
| Hypoxanthine                | 5.28 | 137   | 110   | 24 | 55.1 | 36 | 148 |
| Uridine                     | 6.33 | 245.1 | 113   | 8  | 70   | 40 | 84  |
| Xanthine                    | 6.40 | 153   | 110   | 20 | 55.1 | 36 | 84  |
| Adenosine                   | 6.67 | 268.1 | 136   | 20 | 119  | 40 | 84  |
| Thymine                     | 6.71 | 127.1 | 110   | 16 | 54.1 | 28 | 84  |
| Guanosine                   | 6.91 | 284.1 | 152   | 12 | 135  | 40 | 84  |
| Inosine                     | 6.91 | 269.1 | 137   | 16 | 110  | 40 | 84  |
| Thymidine                   | 7.28 | 243.1 | 127   | 8  | 117  | 8  | 84  |

## References

- 1 Xia, J. & Wishart, D. S. Web-based inference of biological patterns, functions and pathways from metabolomic data using MetaboAnalyst. *Nature Protocols* **6**, 743, doi:10.1038/nprot.2011.319 (2011).
- 2 Beer, C., Foldbjerg, R., Hayashi, Y., Sutherland, D. S. & Autrup, H. J. T. I. Toxicity of silver nanoparticles—nanoparticle or silver ion? *Toxicology letters* **208**, 286-292 (2012).
- 3 Cheloni, G. & Slaveykova, V. I. Photo-Oxidative Stress in Green Algae and Cyanobacteria. *Reactive Oxygen Species* **5** (2018).
- 4 Cheloni, G., Marti, E. & Slaveykova, V. I. Interactive effects of copper oxide nanoparticles and light to green alga *Chlamydomonas reinhardtii*. *Aquatic Toxicology* **170**, 120-128, doi:10.1016/j.aquatox.2015.11.018 (2016).
